# Supplementary material
Source: Springer Nature journal article supplement (https://www.springermedizin.de/resource/supplementary/12957_2013_1494_MOESM1_ESM.pdf/9562782)
Supplement: MOESM1 [file 9562782]

N=520 records identified through database searching

385 studies were excluded, because they were not related to the study of colorectal cancer

N=135 records screened

127 articles were excluded, because they did not compare the presence of hypertension and effect of Bevacizumab.

N=8 full text articles assessed for eligibility

1 article was excluded, because it also related to other tumors

N=7 studies included in quantitative synthesis
